# Supplementary material for: Individualized spatial network predictions using Siamese convolutional neural networks: A resting-state fMRI study of over 11,000 unaffected individuals
Source: PubMed Central journal article supplement (PMC8782493; doi:10.1371/journal.pone.0249502), 2022-01-21
Supplement: pone.0249502.s002.pdf [file pone.0249502.s002.pdf]

|       |    |    |    |    |    |    |    |    |    |    |    |    |    |    |    |    |    |    |    |    |    |    |    |    |    |    |    |    |    |    |    |    |    |    |    |    |    |    |    |    |    |    |    |    |    |    |    |    |    |    |    |    |    |
|-------|----|----|----|----|----|----|----|----|----|----|----|----|----|----|----|----|----|----|----|----|----|----|----|----|----|----|----|----|----|----|----|----|----|----|----|----|----|----|----|----|----|----|----|----|----|----|----|----|----|----|----|----|----|
| SC 69 | 81 | 80 | 81 | 80 | 77 | 76 | 77 | 77 | 76 | 77 | 79 | 81 | 77 | 78 | 76 | 76 | 79 | 78 | 80 | 79 | 77 | 78 | 79 | 78 | 77 | 79 | 81 | 79 | 77 | 78 | 77 | 74 | 78 | 78 | 84 | 78 | 81 | 77 | 82 | 78 | 75 | 80 | 79 | 77 | 81 | 76 | 77 | 77 | 80 | 77 |    |    |    |
| SC 53 | 81 | 83 | 85 | 85 | 81 | 79 | 81 | 79 | 79 | 81 | 81 | 83 | 80 | 82 | 80 | 80 | 81 | 81 | 81 | 80 | 82 | 82 | 81 | 80 | 81 | 81 | 84 | 80 | 80 | 81 | 81 | 77 | 80 | 79 | 86 | 81 | 86 | 79 | 85 | 80 | 79 | 83 | 80 | 83 | 84 | 80 | 79 | 81 | 82 | 80 | 79 |    |    |
| SC 98 | 80 | 83 | 83 | 83 | 82 | 78 | 77 | 77 | 78 | 78 | 79 | 81 | 78 | 78 | 78 | 80 | 78 | 78 | 78 | 79 | 80 | 78 | 78 | 79 | 77 | 80 | 79 | 78 | 80 | 79 | 78 | 79 | 77 | 78 | 79 | 84 | 78 | 80 | 79 | 81 | 79 | 84 | 78 | 80 | 79 | 81 | 79 | 79 | 79 | 80 | 78 |    |    |
| SC 99 | 81 | 85 | 83 | 83 | 80 | 78 | 80 | 79 | 78 | 79 | 82 | 82 | 81 | 82 | 79 | 79 | 78 | 80 | 81 | 80 | 81 | 80 | 80 | 79 | 79 | 82 | 80 | 81 | 80 | 80 | 81 | 80 | 79 | 79 | 79 | 86 | 81 | 85 | 81 | 84 | 83 | 79 | 82 | 81 | 81 | 85 | 80 | 81 | 81 | 80 | 80 |    |    |
| SC 45 | 80 | 85 | 82 | 83 | 78 | 78 | 78 | 79 | 76 | 77 | 79 | 81 | 82 | 77 | 78 | 78 | 80 | 78 | 80 | 77 | 78 | 79 | 79 | 79 | 79 | 79 | 79 | 79 | 81 | 80 | 79 | 77 | 80 | 77 | 84 | 79 | 84 | 76 | 83 | 80 | 78 | 81 | 78 | 80 | 80 | 78 | 80 | 79 | 81 | 79 | 77 |    |    |
| AU 21 | 77 | 81 | 78 | 80 | 78 | 75 | 80 | 76 | 76 | 77 | 78 | 79 | 76 | 77 | 75 | 77 | 77 | 75 | 77 | 78 | 78 | 79 | 76 | 76 | 77 | 76 | 78 | 76 | 79 | 77 | 80 | 76 | 73 | 75 | 76 | 81 | 78 | 80 | 77 | 80 | 78 | 75 | 78 | 78 | 78 | 76 | 76 | 77 | 75 | 78 | 76 |    |    |
| AU 56 | 76 | 79 | 77 | 78 | 78 | 75 | 84 | 77 | 73 | 75 | 77 | 78 | 75 | 74 | 75 | 74 | 75 | 76 | 77 | 77 | 76 | 76 | 77 | 76 | 76 | 76 | 77 | 77 | 75 | 77 | 76 | 78 | 75 | 74 | 75 | 75 | 80 | 75 | 79 | 75 | 80 | 75 | 73 | 76 | 75 | 76 | 79 | 76 | 77 | 77 | 76 | 75 |    |
| SM 3  | 77 | 81 | 77 | 80 | 79 | 80 | 84 | 81 | 76 | 81 | 78 | 80 | 81 | 77 | 84 | 75 | 75 | 77 | 77 | 75 | 78 | 76 | 75 | 77 | 78 | 79 | 80 | 79 | 79 | 81 | 76 | 77 | 77 | 82 | 81 | 81 | 78 | 80 | 75 | 76 | 77 | 77 | 81 | 76 | 79 | 77 | 76 | 75 | 77 | 76 | 75 |    |    |
| SM 9  | 77 | 79 | 77 | 79 | 76 | 76 | 77 | 81 | 77 | 84 | 79 | 80 | 80 | 79 | 84 | 76 | 75 | 76 | 77 | 77 | 76 | 77 | 76 | 77 | 76 | 76 | 76 | 76 | 76 | 76 | 76 | 77 | 76 | 77 | 76 | 80 | 78 | 80 | 77 | 81 | 75 | 75 | 76 | 76 | 78 | 76 | 77 | 76 | 78 | 74 | 74 |    |    |
| SM 2  | 76 | 79 | 78 | 78 | 77 | 76 | 73 | 76 | 77 | 78 | 84 | 79 | 74 | 74 | 76 | 74 | 75 | 74 | 76 | 73 | 76 | 75 | 75 | 77 | 73 | 77 | 74 | 75 | 75 | 77 | 76 | 74 | 75 | 74 | 79 | 74 | 80 | 75 | 79 | 73 | 74 | 75 | 75 | 78 | 76 | 77 | 75 | 74 | 75 | 73 | 73 |    |    |
| SM 11 | 77 | 81 | 78 | 79 | 79 | 77 | 75 | 81 | 84 | 78 | 82 | 81 | 80 | 80 | 82 | 78 | 76 | 76 | 77 | 78 | 76 | 78 | 76 | 77 | 78 | 77 | 79 | 77 | 75 | 77 | 78 | 83 | 75 | 76 | 75 | 82 | 78 | 82 | 77 | 80 | 77 | 75 | 79 | 78 | 77 | 79 | 78 | 79 | 76 | 78 | 77 | 78 |    |
| SM 27 | 79 | 81 | 79 | 82 | 81 | 78 | 77 | 78 | 79 | 84 | 82 | 80 | 76 | 80 | 78 | 76 | 76 | 80 | 78 | 76 | 76 | 77 | 79 | 76 | 76 | 77 | 76 | 79 | 77 | 76 | 79 | 78 | 76 | 77 | 76 | 81 | 76 | 81 | 76 | 80 | 77 | 76 | 78 | 77 | 78 | 81 | 79 | 77 | 77 | 77 | 77 | 77 |    |
| SM 54 | 81 | 83 | 81 | 82 | 82 | 79 | 78 | 80 | 80 | 79 | 81 | 80 | 80 | 79 | 79 | 78 | 81 | 79 | 82 | 79 | 80 | 82 | 80 | 79 | 79 | 80 | 81 | 79 | 79 | 80 | 81 | 79 | 77 | 79 | 77 | 86 | 80 | 85 | 77 | 83 | 79 | 80 | 81 | 80 | 79 | 82 | 79 | 81 | 79 | 80 | 79 | 79 |    |
| SM 66 | 77 | 80 | 78 | 81 | 77 | 76 | 75 | 81 | 80 | 74 | 80 | 76 | 80 | 77 | 75 | 76 | 76 | 75 | 75 | 76 | 76 | 77 | 75 | 76 | 76 | 76 | 78 | 77 | 75 | 76 | 77 | 76 | 74 | 74 | 74 | 81 | 76 | 79 | 80 | 75 | 76 | 78 | 77 | 77 | 79 | 75 | 75 | 76 | 75 | 76 | 76 |    |    |
| SM 80 | 78 | 82 | 78 | 82 | 78 | 77 | 74 | 77 | 79 | 74 | 80 | 80 | 79 | 77 | 81 | 78 | 79 | 78 | 82 | 81 | 78 | 83 | 80 | 78 | 82 | 76 | 79 | 77 | 78 | 77 | 81 | 81 | 76 | 77 | 76 | 80 | 76 | 80 | 77 | 80 | 77 | 82 | 76 | 77 | 80 | 81 | 82 | 78 | 79 | 77 | 77 | 77 |    |
| SM 72 | 76 | 80 | 78 | 79 | 78 | 75 | 75 | 84 | 84 | 76 | 82 | 78 | 79 | 75 | 81 | 75 | 77 | 75 | 77 | 76 | 76 | 77 | 76 | 75 | 78 | 76 | 78 | 75 | 78 | 76 | 79 | 81 | 74 | 76 | 75 | 81 | 80 | 81 | 75 | 80 | 76 | 76 | 76 | 76 | 80 | 75 | 78 | 77 | 76 | 75 | 74 | 74 |    |
| VI 16 | 76 | 80 | 80 | 79 | 78 | 77 | 74 | 75 | 76 | 74 | 78 | 76 | 78 | 75 | 83 | 77 | 87 | 82 | 79 | 84 | 87 | 78 | 78 | 77 | 80 | 77 | 79 | 78 | 80 | 78 | 76 | 78 | 76 | 82 | 78 | 82 | 78 | 81 | 78 | 83 | 79 | 78 | 78 | 82 | 77 | 82 | 76 | 77 | 77 | 77 | 77 |    |    |
| VI 5  | 79 | 81 | 78 | 78 | 80 | 76 | 77 | 75 | 75 | 75 | 76 | 81 | 76 | 79 | 77 | 83 | 80 | 87 | 86 | 79 | 86 | 77 | 80 | 82 | 78 | 76 | 79 | 80 | 79 | 79 | 78 | 75 | 78 | 78 | 83 | 77 | 81 | 77 | 78 | 77 | 77 | 80 | 78 | 77 | 77 | 78 | 79 | 79 | 79 | 80 | 76 | 79 |    |
| VI 62 | 78 | 81 | 78 | 80 | 78 | 75 | 76 | 77 | 76 | 74 | 76 | 78 | 79 | 75 | 78 | 75 | 77 | 80 | 78 | 79 | 76 | 82 | 76 | 78 | 80 | 76 | 77 | 77 | 76 | 79 | 77 | 75 | 76 | 74 | 79 | 75 | 80 | 75 | 80 | 76 | 76 | 79 | 76 | 77 | 80 | 76 | 83 | 77 | 76 | 77 | 76 |    |    |
| VI 15 | 80 | 81 | 78 | 81 | 80 | 77 | 77 | 77 | 76 | 77 | 78 | 82 | 75 | 82 | 77 | 87 | 87 | 78 | 86 | 79 | 84 | 88 | 77 | 76 | 77 | 80 | 80 | 81 | 76 | 81 | 79 | 75 | 77 | 76 | 84 | 79 | 83 | 76 | 80 | 78 | 81 | 80 | 76 | 79 | 81 | 78 | 83 | 78 | 79 | 78 | 76 |    |    |
| VI 12 | 79 | 80 | 79 | 80 | 77 | 78 | 77 | 77 | 76 | 78 | 78 | 79 | 76 | 81 | 76 | 82 | 86 | 79 | 86 | 77 | 80 | 82 | 78 | 76 | 82 | 79 | 80 | 77 | 77 | 79 | 78 | 74 | 78 | 76 | 82 | 77 | 81 | 76 | 81 | 77 | 78 | 78 | 79 | 82 | 77 | 77 | 78 | 79 | 78 | 77 | 77 |    |    |
| VI 93 | 77 | 82 | 80 | 81 | 78 | 78 | 76 | 75 | 76 | 73 | 76 | 77 | 80 | 76 | 78 | 76 | 79 | 76 | 79 | 77 | 78 | 78 | 78 | 80 | 77 | 77 | 79 | 78 | 75 | 76 | 77 | 82 | 76 | 81 | 75 | 81 | 78 | 76 | 80 | 76 | 78 | 80 | 77 | 78 | 79 | 77 | 79 | 77 | 79 | 77 | 79 | 77 |    |
| VI 20 | 78 | 82 | 79 | 82 | 79 | 79 | 76 | 78 | 77 | 76 | 78 | 79 | 82 | 77 | 83 | 77 | 84 | 83 | 82 | 84 | 80 | 78 | 83 | 77 | 78 | 79 | 80 | 78 | 78 | 81 | 78 | 76 | 78 | 76 | 82 | 79 | 83 | 78 | 81 | 77 | 78 | 79 | 79 | 82 | 77 | 82 | 79 | 78 | 79 | 78 | 76 |    |    |
| VI 8  | 79 | 81 | 78 | 80 | 79 | 76 | 77 | 76 | 76 | 75 | 76 | 80 | 75 | 80 | 76 | 87 | 87 | 76 | 88 | 82 | 78 | 83 | 79 | 78 | 76 | 79 | 76 | 77 | 77 | 76 | 76 | 77 | 82 | 77 | 81 | 77 | 79 | 78 | 79 | 79 | 78 | 77 | 77 | 80 | 77 | 77 | 78 | 76 | 78 | 76 | 78 |    |    |
| VI 77 | 78 | 80 | 79 | 82 | 79 | 76 | 76 | 75 | 77 | 75 | 77 | 76 | 79 | 76 | 78 | 75 | 78 | 76 | 78 | 77 | 78 | 77 | 79 | 77 | 77 | 78 | 76 | 76 | 78 | 77 | 77 | 74 | 75 | 75 | 79 | 78 | 80 | 75 | 80 | 76 | 77 | 79 | 77 | 76 | 79 | 76 | 77 | 77 | 76 | 78 | 78 |    |    |
| CC 68 | 77 | 81 | 78 | 80 | 79 | 77 | 76 | 77 | 76 | 77 | 78 | 77 | 79 | 76 | 82 | 78 | 76 | 80 | 76 | 77 | 78 | 78 | 78 | 77 | 78 | 76 | 82 | 79 | 80 | 77 | 81 | 75 | 81 | 77 | 80 | 77 | 81 | 77 | 80 | 77 | 81 | 77 | 76 | 77 | 77 | 79 | 83 | 76 | 78 | 77 | 75 |    |    |
| CC 33 | 79 | 81 | 77 | 79 | 79 | 76 | 77 | 75 | 75 | 75 | 76 | 81 | 76 | 79 | 77 | 79 | 76 | 77 | 78 | 78 | 79 | 76 | 77 | 78 | 77 | 79 | 78 | 75 | 77 | 76 | 84 | 77 | 81 | 77 | 79 | 78 | 75 | 77 | 76 | 84 | 77 | 81 | 77 | 77 | 78 | 77 | 77 | 78 | 79 | 78 | 77 |    |    |
| CC 43 | 81 | 84 | 80 | 82 | 80 | 78 | 77 | 79 | 78 | 77 | 79 | 79 | 81 | 78 | 79 | 80 | 80 | 77 | 80 | 80 | 80 | 79 | 78 | 78 | 79 | 76 | 78 | 81 | 77 | 74 | 78 | 78 | 81 | 78 | 83 | 78 | 81 | 77 | 77 | 78 | 79 | 82 | 77 | 82 | 79 | 77 | 78 | 79 | 77 | 78 | 79 |    |    |
| CC 70 | 80 | 79 | 80 | 79 | 76 | 75 | 80 | 76 | 74 | 77 | 77 | 79 | 77 | 77 | 75 | 77 | 78 | 77 | 80 | 77 | 77 | 78 | 76 | 76 | 76 | 76 | 76 | 76 | 79 | 78 | 76 | 79 | 78 | 76 | 80 | 78 | 82 | 77 | 79 | 77 | 75 | 77 | 78 | 77 | 80 | 76 | 78 | 77 | 77 | 78 | 77 |    |    |
| CC 61 | 77 | 80 | 78 | 81 | 79 | 79 | 77 | 76 | 75 | 75 | 76 | 79 | 75 | 78 | 78 | 79 | 79 | 77 | 81 | 77 | 77 | 78 | 77 | 76 | 82 | 79 | 80 | 76 | 76 | 80 | 82 | 82 | 76 | 77 | 77 | 82 | 78 | 81 | 79 | 80 | 78 | 77 | 79 | 78 | 81 | 77 | 77 | 79 | 78 | 76 |    |    |    |
| CC 55 | 78 | 81 | 80 | 80 | 77 | 77 | 76 | 79 | 77 | 75 | 77 | 77 | 80 | 76 | 77 | 76 | 78 | 79 | 76 | 77 | 79 | 78 | 77 | 78 | 79 | 77 | 78 | 80 | 80 | 78 | 76 | 78 | 78 | 83 | 78 | 82 | 78 | 81 | 78 | 76 | 79 | 78 | 79 | 82 | 78 | 79 | 82 | 78 | 79 | 77 | 78 | 77 |    |
| CC 63 | 78 | 81 | 79 | 81 | 80 | 80 | 78 | 79 | 76 | 77 | 78 | 79 | 81 | 77 | 81 | 79 | 80 | 79 | 79 | 81 | 79 | 81 | 77 | 77 | 86 | 79 | 81 | 78 | 82 | 80 | 82 | 78 | 79 | 79 | 83 | 81 | 83 | 80 | 83 | 78 | 80 | 79 | 83 | 80 | 83 | 78 | 80 | 79 | 82 | 80 | 80 | 78 | 78 |
| CC 79 | 77 | 81 | 78 | 80 | 79 | 76 | 75 | 81 | 77 | 76 | 83 | 78 | 79 | 76 | 81 | 81 | 78 | 78 | 77 | 79 | 78 | 78 | 76 | 77 | 82 | 78 | 77 | 76 | 82 | 78 | 82 | 82 | 74 | 75 | 75 | 80 | 76 | 81 | 80 | 77 | 77 | 77 | 78 | 76 | 77 | 77 | 79 | 79 | 78 | 77 | 79 | 76 | 77 |
| CC 84 | 74 | 77 | 77 | 80 | 77 | 73 | 74 | 76 |    |    |    |    |    |    |    |    |    |    |    |    |    |    |    |    |    |    |    |    |    |    |    |    |    |    |    |    |    |    |    |    |    |    |    |    |    |    |    |    |    |    |    |    |    |
