# Supplementary material for: Individualized spatial network predictions using Siamese convolutional neural networks: A resting-state fMRI study of over 11,000 unaffected individuals
Source: PubMed Central journal article supplement (PMC8782493; doi:10.1371/journal.pone.0249502), 2022-01-21

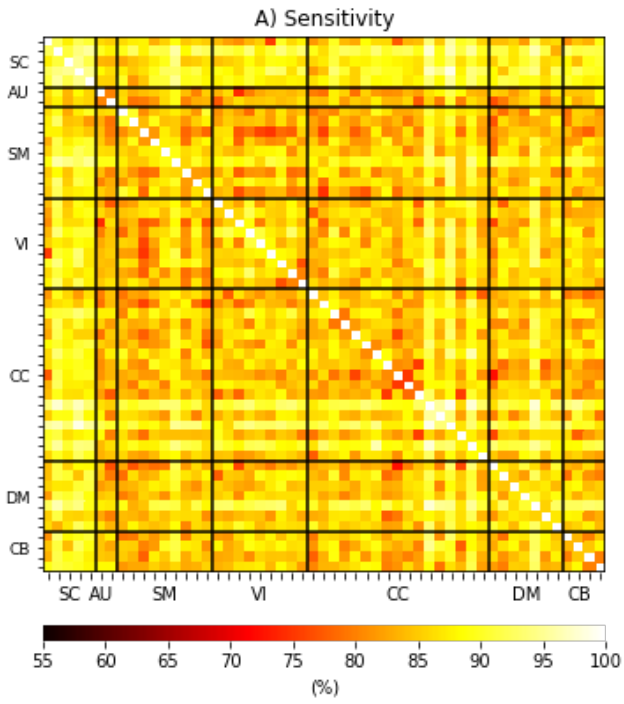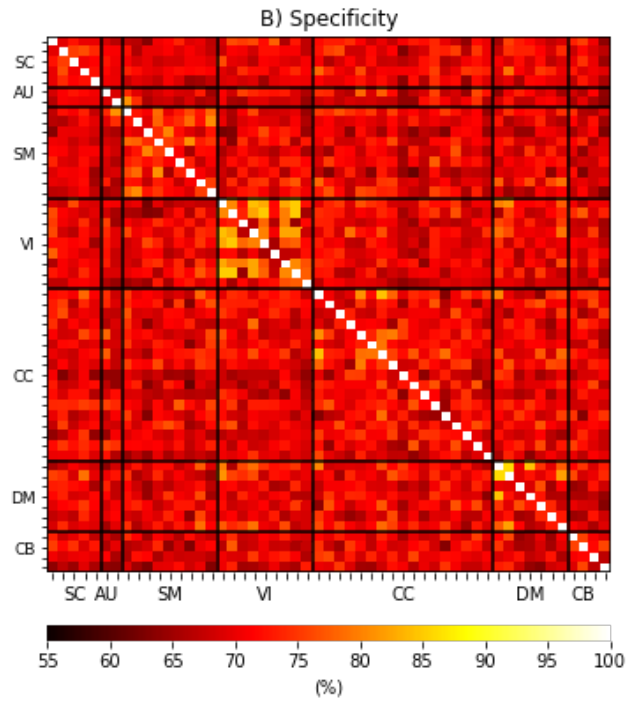

Supplement: pone.0249502.s003.pdf [file pone.0249502.s003.pdf]
