# Supplementary material for: Individualized spatial network predictions using Siamese convolutional neural networks: A resting-state fMRI study of over 11,000 unaffected individuals
Source: PubMed Central journal article supplement (PMC8782493; doi:10.1371/journal.pone.0249502), 2022-01-21

## Variability of males' brains v.s. females' and younger brains v.s. elders' across domain

A) Percentage of network pairs within domain that sensitivity in male cohort is larger than female cohort

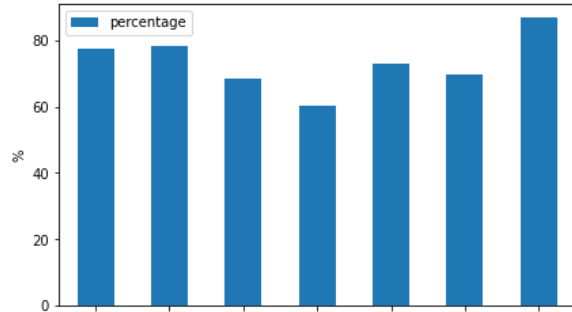

B) Percentage of network pairs within domain that specificity in different-sex cohort is larger than same-sex cohort

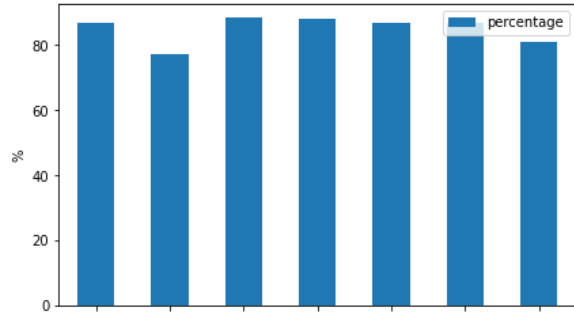

C) Percentage of network pairs within domain that sensitivity in young cohort is larger than old cohort

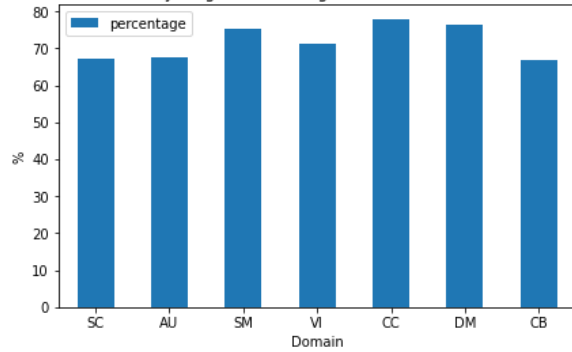

D) Percentage of network pairs within domain that specificity in young cohort is larger than old cohort

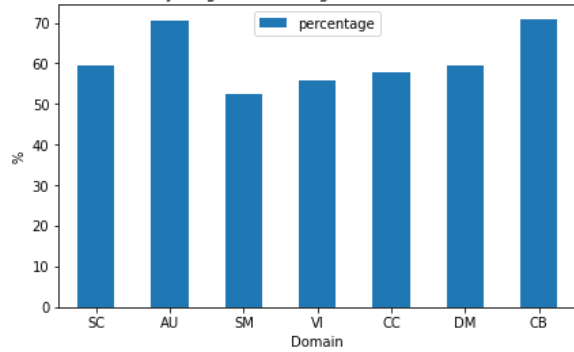

Supplement: pone.0249502.s006.pdf [file pone.0249502.s006.pdf]
